# Supplementary material
Source: MDPI journal article supplement (https://www.mdpi.com/2220-9964/10/5/281)

Year One

Year Two

Year Three

Year Four

Year Five

Recode Crop/Non-crop  
1=Crop 2=Not Crop 3=Fallow

Multiply and Add Years

|        |       |     |    |   |
|--------|-------|-----|----|---|
| 10,000 | 1,000 | 100 | 10 | 1 |
| 20,000 | 2,000 | 200 | 20 | 2 |
| 30,000 | 3,000 | 300 | 30 | 3 |

Apply 3X3 Majority Filter

Only keep 21111, 22111, 22211, 22221

Remove NLCD Cropland 2001, 2006

Remove Clusters < 15 Acres

Determine Land Changed Categories

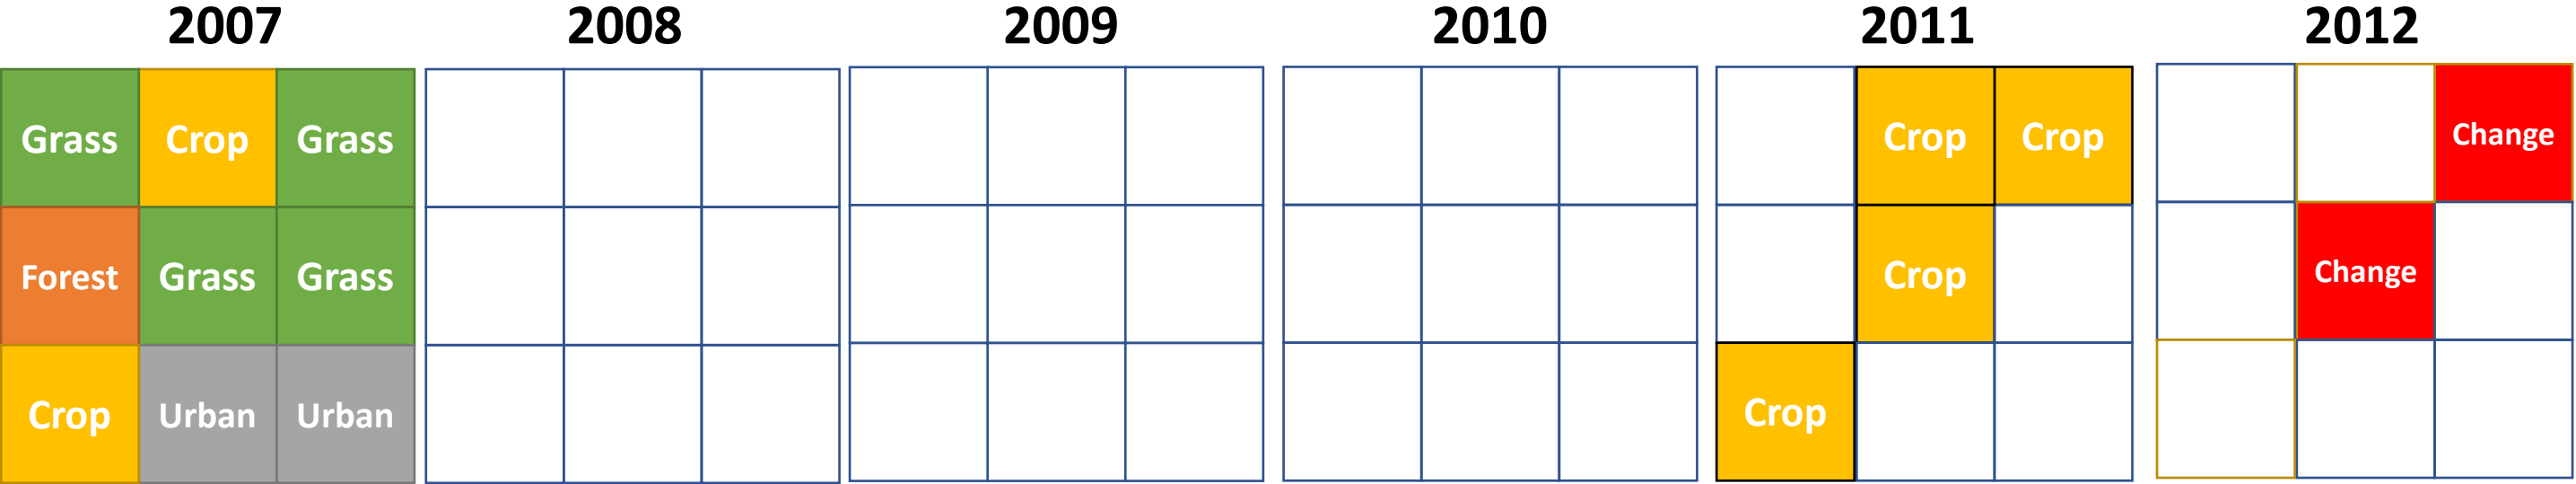

Most studies only look at land that is change between Pre-change and Post-change year

Vetting, such as removal of unlikely land cover change scenarios, only occurs in this footprint

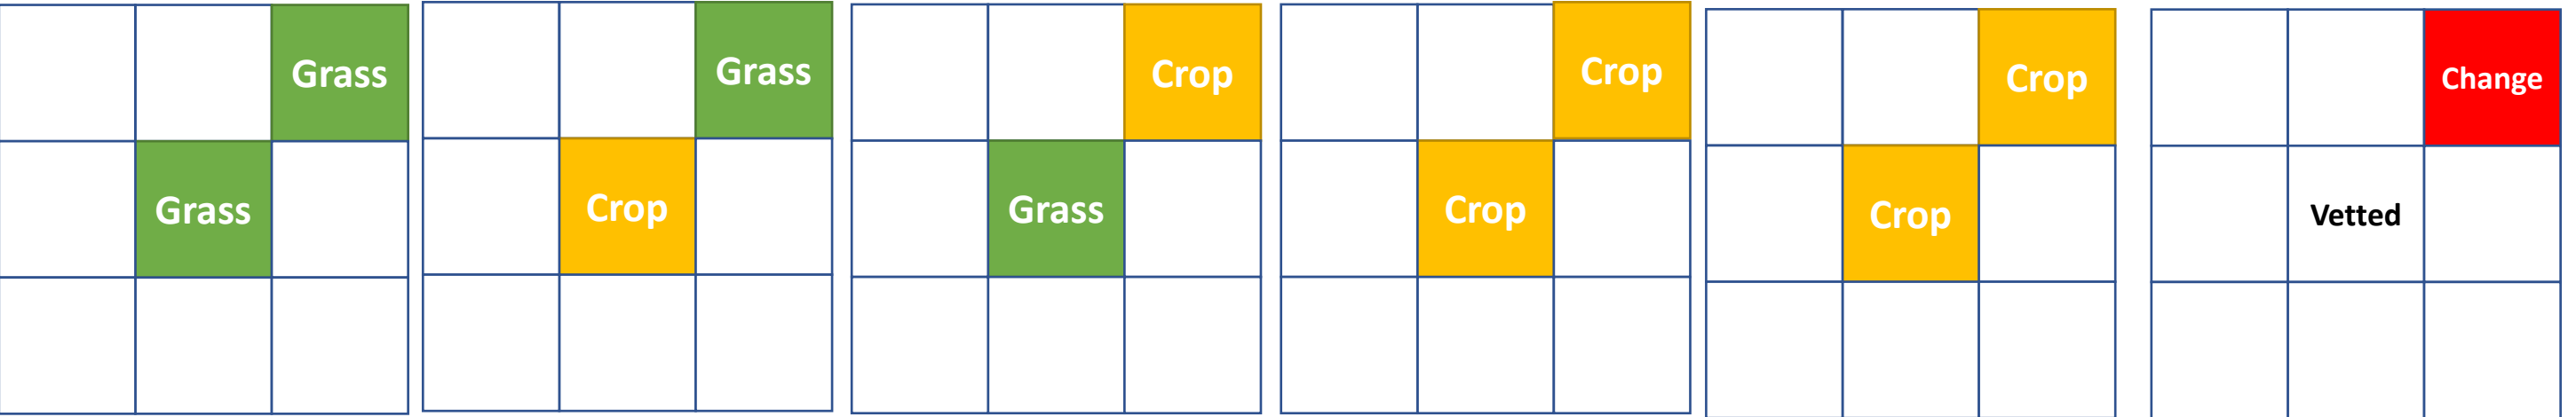

This analysis reviewed the entire U.S. footprint to look for land cover change outside of the change footprint

Change in between years will likely not occur outside the 2007 to 2012 footprint

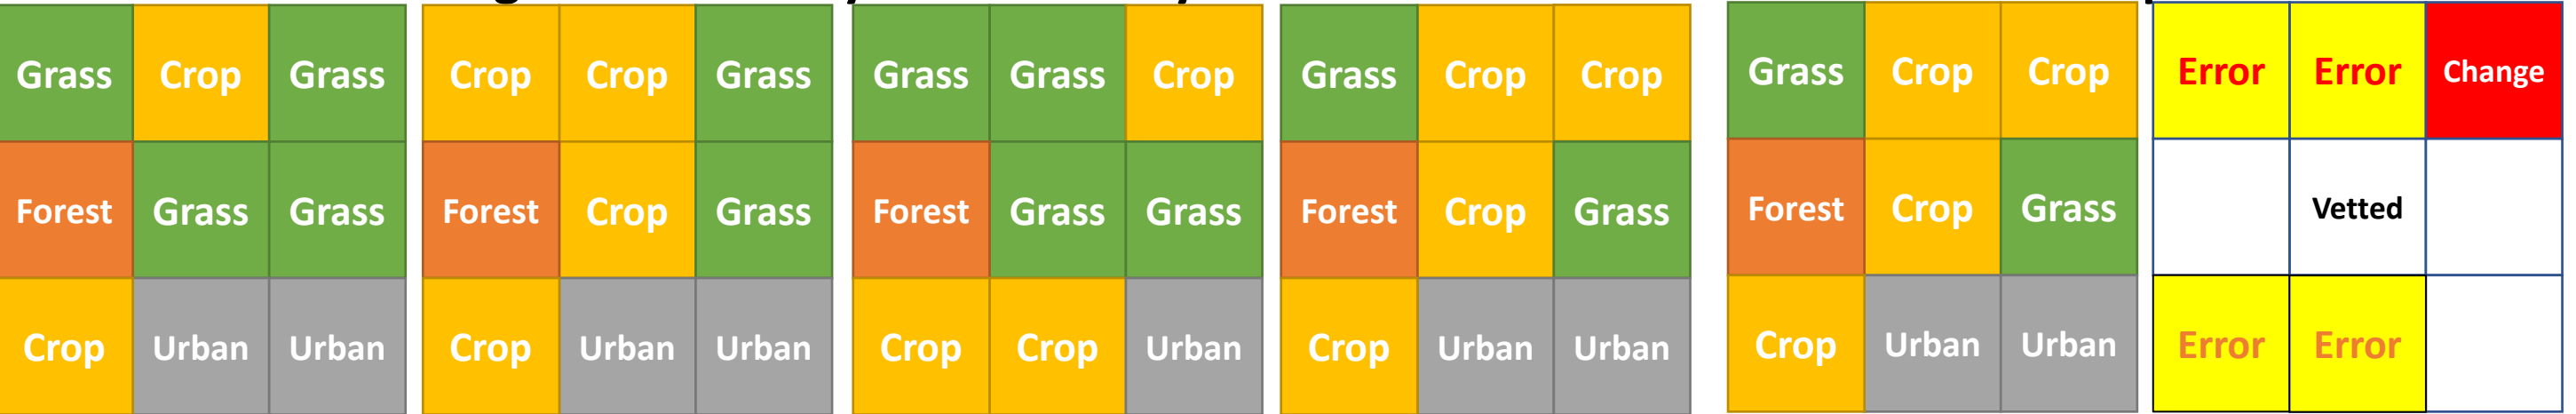

Supplement: s1 [file s1]
